# Supplementary material
Source: PubMed Central journal article supplement (PMC5561742)

FIG. S1

TorA<sup>+/+</sup>

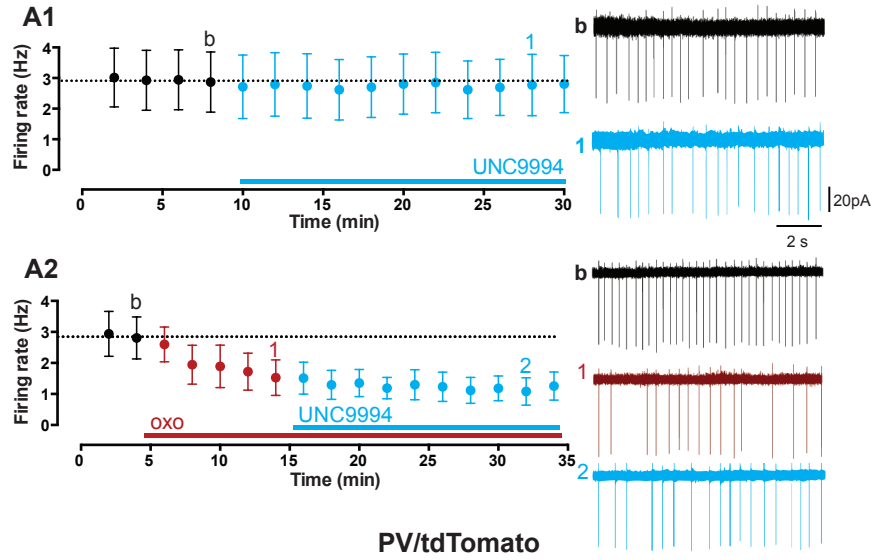

PV/tdTomato

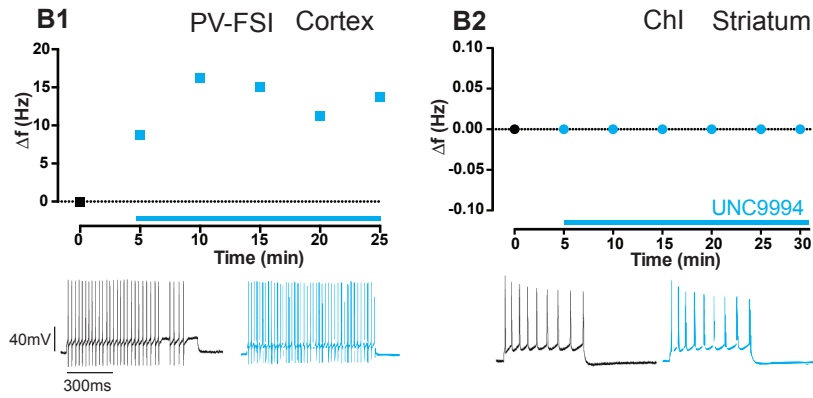

Supplement: NIHMS884912-supplement-1.pdf [file NIHMS884912-supplement-1.pdf]

Fig. S2

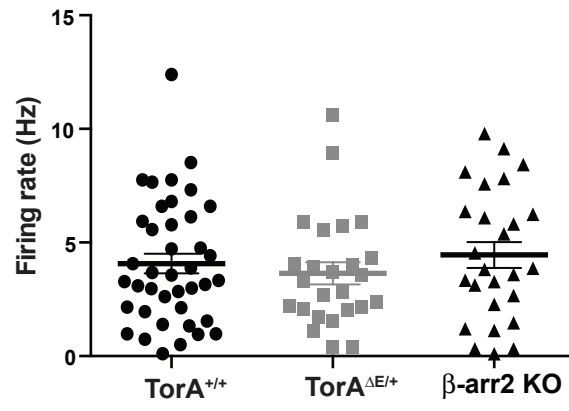

Supplement: NIHMS884912-supplement-2.pdf [file NIHMS884912-supplement-2.pdf]
